# Supplementary material for: Apical Sperm Hook Morphology Is Linked to Sperm Swimming Performance and Sperm Aggregation in Peromyscus Mice
Source: MDPI journal article supplement (doi:10.3390/cells10092279), 2021-09-01
Supplement: s1 [file s1]

# Apical sperm hook morphology is linked to sperm swimming performance and sperm aggregation in *Peromyscus* mice

Kristin A. Hook, Lauren M. Wilke and Heidi S. Fisher

## Supplementary information

**Table S1.** Mean ( $\pm$  SE) measurements for linear and relative sperm hook morphology traits within six closely related focal species of *Peromyscus* mice

| <i>Peromyscus</i><br>Species | Sperm Trait                      |                                 |                                  |                         |                        |                       |
|------------------------------|----------------------------------|---------------------------------|----------------------------------|-------------------------|------------------------|-----------------------|
|                              | Linear Measures                  |                                 |                                  | Relative Measures       |                        |                       |
|                              | Hook Length<br>( $\mu\text{m}$ ) | Hook Width<br>( $\mu\text{m}$ ) | Hook Area<br>( $\mu\text{m}^2$ ) | Relative<br>Hook Length | Relative<br>Hook Width | Relative<br>Hook Area |
| <i>P. californicus</i>       | 4.22 $\pm$ 0.05<br>(3.8%)        | 0.61 $\pm$ 0.01<br>(3.9%)       | 1.46 $\pm$ 0.02<br>(6.2%)        | 0.90                    | 0.22                   | 0.12                  |
| <i>P. eremicus</i>           | 4.78 $\pm$ 0.04<br>(3.9%)        | 0.71 $\pm$ 0.01<br>(4.1%)       | 1.88 $\pm$ 0.03<br>(6.3%)        | 0.97                    | 0.22                   | 0.13                  |
| <i>P. polionotus</i>         | 4.23 $\pm$ 0.03<br>(4.3%)        | 0.65 $\pm$ 0.01<br>(4.3%)       | 1.53 $\pm$ 0.02<br>(6.7%)        | 0.93                    | 0.21                   | 0.12                  |
| <i>P. maniculatus</i>        | 4.20 $\pm$ 0.04<br>(4.5%)        | 0.67 $\pm$ 0.01<br>(4.8%)       | 1.43 $\pm$ 0.02<br>(7.3%)        | 0.89                    | 0.21                   | 0.11                  |
| <i>P. leucopus</i>           | 4.07 $\pm$ 0.04<br>(4.6%)        | 0.63 $\pm$ 0.01<br>(5.8%)       | 1.39 $\pm$ 0.02<br>(7.9%)        | 0.89                    | 0.23                   | 0.12                  |
| <i>P. gossypinus</i>         | 4.40 $\pm$ 0.04<br>(6.0%)        | 0.64 $\pm$ 0.01<br>(6.5%)       | 1.42 $\pm$ 0.03<br>(8.7%)        | 0.94                    | 0.23                   | 0.12                  |

Relative hook measures are based on mean head length, head width, and head area, respectively. Coefficients of variation for each linear trait are indicated within parentheses.
